## QUESTIONNAIRE REVIEW

# Effort–Reward Imbalance Questionnaire

### Brief history

Siegrist's Effort–Reward Imbalance (ERI) model proposes that where there is an imbalance between work effort and reward, such that the effort is greater than the reward, work stress results, which may lead to a range of adverse health outcomes [1]. The model also proposes that over-commitment (personal motivation to work excessively) increases the risk of adverse health outcomes and that there is an interaction effect of over-commitment and ERI [1]. The ERI questionnaire, developed by Siegrist, measures effort, reward and over-commitment, to determine whether ERI and over-commitment are present [1]. This was originally in German, but has been translated into a number of languages including English, Swedish and French [1].

### Description

The ERI questionnaire is a standardized, self-report measure of ERI, which includes items regarding effort, reward and over-commitment [2,3]. There are currently two versions of this questionnaire; long (22 items) and short (16 items) [3], both of which will be discussed within this review. There have been changes to the questionnaire made over time; with the most recent update being made in 2012 [3].

### Items

The 2012 long version of the questionnaire has 16 items: 10 measuring reward, six measuring effort and six measuring over-commitment [3]. Some studies only use five items for measuring reward, with the item 'My job is physically demanding' being excluded [3]. This has been found to be valid in white-collar workers; however, it is suggested that this item be included when investigating blue-collar workers and those performing manual tasks [3]. Data are collected from participants using four-point Likert scales [3].

The short version also uses four-point Likert scales, with three items measuring effort, seven measuring reward and six measuring over-commitment [3].

To identify ERI, the effort–reward ratio is calculated, as follows:

$$ER = k \frac{E}{R}$$

where  $E$  and  $R$  are the effort and reward scores, respectively, and  $k$  is a correction factor ( $k = 7/3$  for the short

version, and  $k = 10/6$  for the long version) [3]. ERI is present when  $ER \neq 1$ , with  $ER < 1$  indicating an imbalance in favour of rewards and  $ER > 1$  indicating an imbalance in favour of effort [3].

### Validity

The long version of the ERI questionnaire has satisfactory convergent and criterion validity, factorial structure, reliability and sensitivity to change over time [1,3], while the short version has satisfactory criterion and discriminant validity, factorial structure and reliability [3,4].

### Key research

The ERI questionnaire has been used in a number of large-scale studies, including the Whitehall II [5], Somstress [6] and GAZEL-Cohort studies [7], while systematic reviews synthesizing findings of studies utilizing the ERI questionnaire have also been published [8,9]. These reviews have reported that the ERI model has been supported in a large number of studies for a range of health outcomes, including cardiovascular disease, behavioural outcomes, job-related well-being, musculoskeletal pain and psychosomatic health symptoms [8,9]. The over-commitment and interaction hypotheses have been less frequently investigated, and the findings are inconsistent [8,9].

The majority of research using the ERI questionnaire has been observational; however, intervention studies using the ERI questionnaire have also been published [2]. The ERI questionnaire in its full or shortened version has recently been used to investigate a wide range of workers including police officers [10], firefighters [11], humanitarian aid workers [12], nurses [13], audiologists [14], obstetricians and gynaecologists [15], academics [16] and teachers [17], in a range of languages. For a comprehensive list of studies using the ERI questionnaire up to 2012, refer to Siegrist [2].

### Source

Both versions of the questionnaire are available from Siegrist *et al.* [3].

### Recommendations for usage

The ERI questionnaire is not intended to be a clinical screening or outcome measure, but may be a valuable

tool for investigating the relationship between occupational stress and a range of health conditions, including cardiovascular disease, behavioural and musculoskeletal outcomes, or as an outcome measure in observational and intervention studies. It is valid and reliable and has been used with a wide range of occupational groups.

## Acknowledgements

J.S. is a recipient of an Australian Postgraduate Award and a SafeWork SA WHS Supplementary Scholarship (funded by the South Australian Government). SafeWork SA and the South Australian Government do not endorse the content of this material and the views expressed herein do not represent the views of SafeWork SA or the South Australian Government.

**Jessica Stanhope**

*School of Public Health, The University of Adelaide,  
Adelaide, South Australia 5001, Australia  
e-mail: [jessica.stanhope@adelaide.edu.au](mailto:jessica.stanhope@adelaide.edu.au)*

## References

1. Siegrist J, Starke D, Chandola T *et al.* The measurement of effort–reward imbalance at work: European comparisons. *Soc Sci Med* 2004;**58**:1483–1499.
2. Siegrist J. *Effort-Reward Imbalance at Work—Theory, Measurement and Evidence*. Düsseldorf, Germany: University Düsseldorf, 2012. [http://www.uniklinik-duesseldorf.de/fileadmin/Datenpool/einrichtungen/institut\\_fuer\\_medizinische\\_soziologie\\_id54/ERI/ERI-Website.pdf](http://www.uniklinik-duesseldorf.de/fileadmin/Datenpool/einrichtungen/institut_fuer_medizinische_soziologie_id54/ERI/ERI-Website.pdf) (1 January 2017, date last accessed).
3. Siegrist J, Li J, Montano D. *Psychometric Properties of the Effort–Reward Imbalance Questionnaire*. Düsseldorf, Germany: University Düsseldorf, 2014. [http://www.uniklinik-duesseldorf.de/fileadmin/Datenpool/einrichtungen/institut\\_fuer\\_medizinische\\_soziologie\\_id54/ERI/PsychometricProperties.pdf](http://www.uniklinik-duesseldorf.de/fileadmin/Datenpool/einrichtungen/institut_fuer_medizinische_soziologie_id54/ERI/PsychometricProperties.pdf) (1 January 2017, date last accessed).
4. Siegrist J, Wege N, Pühlhofer F, Wahrendorf M. A short generic measure of work stress in the era of globalization: effort–reward imbalance. *Int Arch Occup Environ Health* 2009;**82**:1005–1013.
5. Kuper H, Singh-Manoux A, Siegrist J, Marmot M. When reciprocity fails: effort–reward imbalance in relation to coronary heart disease and health functioning within the Whitehall II study. *Occup Environ Med* 2002;**59**:777–784.
6. Godin I, Kittel F. Differential economic stability and psychosocial stress at work: associations with psychosomatic complaints and absenteeism. *Soc Sci Med* 2004;**58**:1543–1553.
7. Goldberg M, Chastang JF, Leclerc A *et al.* Socioeconomic, demographic, occupational, and health factors associated with participation in a long-term epidemiologic survey: a prospective study of the French GAZEL cohort and its target population. *Am J Epidemiol* 2001;**154**:373–384.
8. van Vegchel N, de Jonge J, Bosma H, Schaufeli W. Reviewing the effort–reward imbalance model: drawing up the balance of 45 empirical studies. *Soc Sci Med* 2005;**60**:1117–1131.
9. Koch P, Schablon A, Latza U, Nienhaus A. Musculoskeletal pain and effort–reward imbalance—a systematic review. *BMC Pub Health* 2014;**14**:37.
10. Izawa S, Tsutsumi A, Ogawa N. Effort–reward imbalance, cortisol secretion, and inflammatory activity in police officers with 24-h work shifts. *Int Arch Occup Environ Health* 2016;**89**:1147–1154.
11. Choi B, Schnall P, Dobson M. Twenty-four-hour work shifts, increased job demands, and elevated blood pressure in professional firefighters. *Int Arch Occup Environ Health* 2016;**89**:1111–1125.
12. Jachens L, Houdmont J, Thomas R. Effort–reward imbalance and heavy alcohol consumption among humanitarian aid workers. *J Stud Alcohol Drugs* 2016;**77**:904–913.
13. Topa G, Guglielmi D, Depolo M. Effort–reward imbalance and organisational injustice among aged nurses: a moderated mediation model. *J Nurs Manag* 2016;**24**:834–842.
14. Brännström KJ, Holm L, Larsson J, Lood S, Notsten M, Turunen Taheri S. Occupational stress among Swedish audiologists in clinical practice: reasons for being stressed. *Int J Audiol* 2016;**55**:447–453.
15. Bauer J, Groneberg DA, Brueggmann D. Gender-based workplace assessment in gynecology and obstetrics in Germany: results from the iCEPT Study. *Arch Gynecol Obstet* 2016;**294**:317–326.
16. Kinman G. Effort–reward imbalance and overcommitment in UK academics: implications for mental health, satisfaction and retention. *J High Educ Pol Manage* 2016;**38**:504–518.
17. Hinz A, Zenger M, Brähler E, Spitzer S, Scheuch K, Seibt R. Effort–reward imbalance and mental health problems in 1074 German teachers, compared with those in the general population. *Stress Health* 2016;**32**:224–230.
